# Supplementary material for: Vitamin B12 Regulates the Transcriptional, Metabolic, and Epigenetic Programing in Human Ileal Epithelial Cells
Source: MDPI journal article supplement (doi:10.3390/nu14142825), 2022-07-09
Supplement: s1 [file s1]

**A**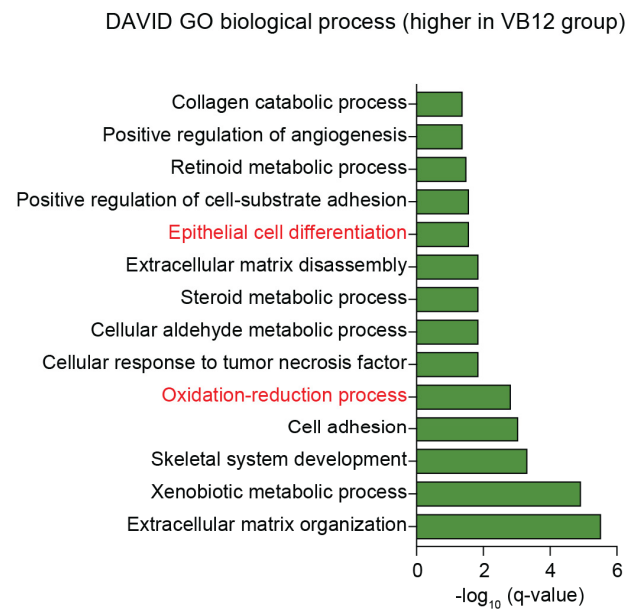**B**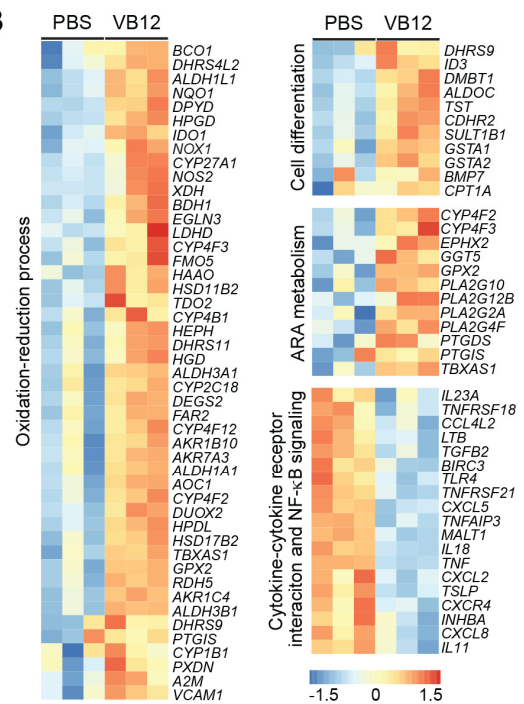

**Figure S1.** Transcriptional regulation of human iECs by VB12. **(A)** Significant DAVID Gene Ontology (GO) pathways in VB12-cultured human iECs. **(B)** Heat maps of DEGs associated with indicated pathways. ARA, arachidonic acid.
