# Supplementary material for: Vitamin B12 Regulates the Transcriptional, Metabolic, and Epigenetic Programing in Human Ileal Epithelial Cells
Source: Nutrients. 2022 Jul 9;14(14):2825. doi: 10.3390/nu14142825 (PMC9321803; doi:10.3390/nu14142825)
Supplement: Supplementary file 1 [file nutrients-14-02825-s001.zip › Table S1.xlsx]

## Sheet: Sheet1
Table S1. Primers used for qPCR
Genes	Forward (5' to 3')	Reverse (5' to 3')
NAPDH	AGAAGGCTGGGGCTCATTTG	AGGGGCCATCCACAGTCTTC
PPARG	GGGATCAGCTCCGTGGATCT	TGCACTTTGGTACTCTTGAAGTT
FABP1	ATGAGTTTCTCCGGCAAGTACC	CTCTTCCGGCAGACCGATTG
ALAS1	CGCCGCTGCCCATTCTTAT	TCTGTTGGACCTTGGCCTTAG
GSTA1	CTGCCCGTATGTCCACCTG	AGCTCCTCGACGTAGTAGAGA
ID1	CTGCTCTACGACATGAACGG	GAAGGTCCCTGATGTAGTCGAT
ID2	AGTCCCGTGAGGTCCGTTAG	AGTCGTTCATGTTGTATAGCAGG
MUC13	ATGCGTGCTGATGACAAGTTT	ACACCGAAGGGTCAAATCATAGT
CLDN2	GCCTCTGGATGGAATGTGCC	GCTACCGCCACTCTGTCTTTG
CLDN18	ACATGCTGGTGACTAACTTCTG	AAATGTGTACCTGGTCTGAACAG
TNF	GAGGCCAAGCCCTGGTATG	CGGGCCGATTGATCTCAGC
IL18	TCTTCATTGACCAAGGAAATCGG	TCCGGGGTGCATTATCTCTAC
CXCL5	AGCTGCGTTGCGTTTGTTTAC	TGGCGAACACTTGCAGATTAC
