# Supplementary material for: Vitamin B12 Regulates the Transcriptional, Metabolic, and Epigenetic Programing in Human Ileal Epithelial Cells
Source: Nutrients. 2022 Jul 9;14(14):2825. doi: 10.3390/nu14142825 (PMC9321803; doi:10.3390/nu14142825)
Supplement: Supplementary file 1 [file nutrients-14-02825-s001.zip › Table S2.xlsx]

## Sheet: Bismark alignment
Table S2. Summary of enzymatic Methyl-seq data processing
Genotype	Sample	Raw Reads	Mapped reads	Mappability	Total Covered Bases	Coverage	% methylation			Conversion rate
							mCG	mCHG	mCHH
GRCh38 primary_assembly	PBS-1	183445191	137941614	0.75195	37244235780	12.0153	0.677	0.023592	0.028507	0.983
GRCh38 primary_assembly	PBS-2	248673772	188486226	0.757966	50891281020	16.418	0.667	0.035064	0.042856	0.974
GRCh38 primary_assembly	PBS-3	245640636	186752346	0.760266	50423133420	16.2669	0.678	0.012883	0.014865	0.991
GRCh38 primary_assembly	VB12-1	190715287	146046606	0.765783	39432583620	12.7213	0.691	0.002991	0.002991	0.997
GRCh38 primary_assembly	VB12-2	280162677	218096373	0.778463	58886020710	18.9971	0.689	0.006958	0.007952	0.994
GRCh38 primary_assembly	VB12-3	236896366	182443203	0.770139	49259664810	15.8916	0.681	0.008937	0.00993	0.993
